# Supplementary material for: A series of manganese–carboxylate coordination polymers exhibiting diverse magnetic properties
Source: Royal Society of Chemistry journal article supplement (doi:10.1039/b808691e), 2008-01-01
Supplement: b808691e.pdf [file b808691e.pdf]

## Supporting Information Available

A series of manganese-carboxylate coordination polymers exhibiting diverse magnetic properties

Wei Li, Hong-Peng Jia, Zhan-Feng Ju, and Jie Zhang\*

State Key Laboratory of Structural Chemistry, Fujian Institute of Research on the Structure of Matter, and Graduate School of the Chinese Academy of Sciences, Fuzhou, Fujian 350002 (China).

E-mail: zhangjie@fjirsm.ac.cn; Fax: (+86) 591-8371-0051

---

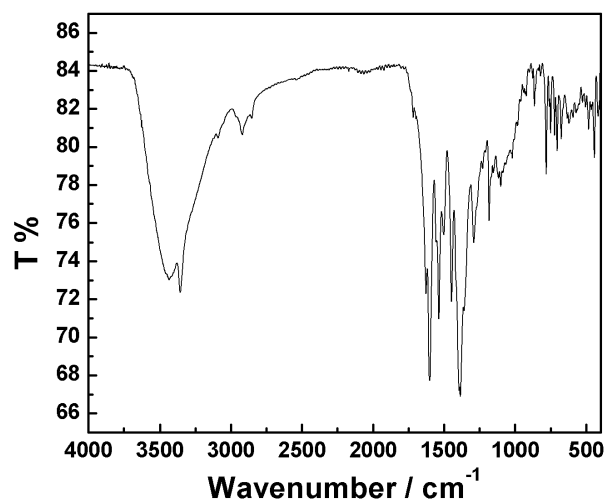

Figure S1. IR spectrum of compound 1.

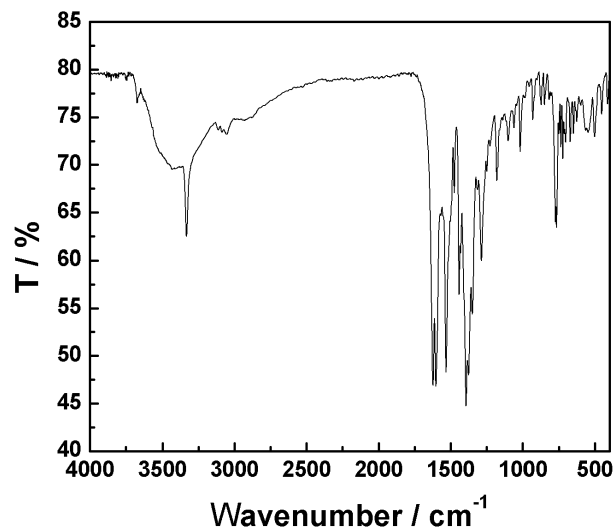

Figure S2. IR spectrum of compound 2.

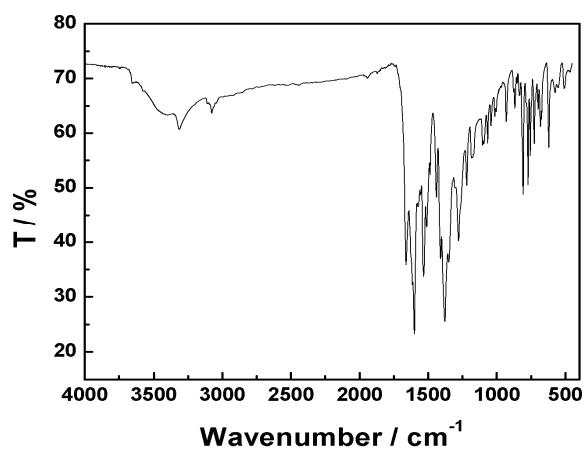

Figure S3. IR spectrum of compound 3.

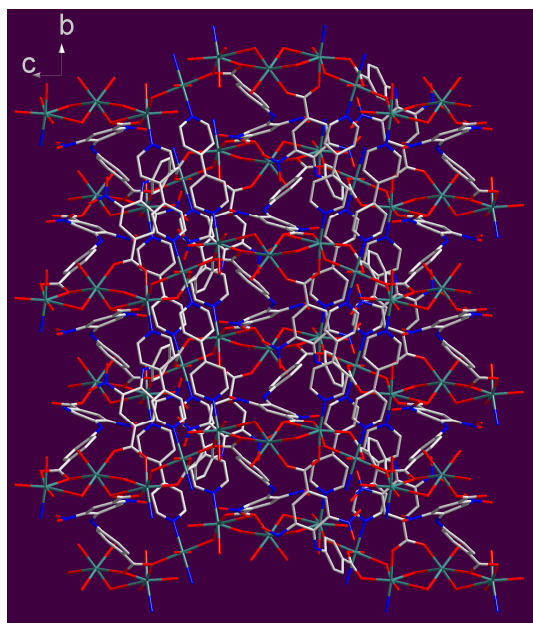

Figure S4. The complex 3D network of compound 3.

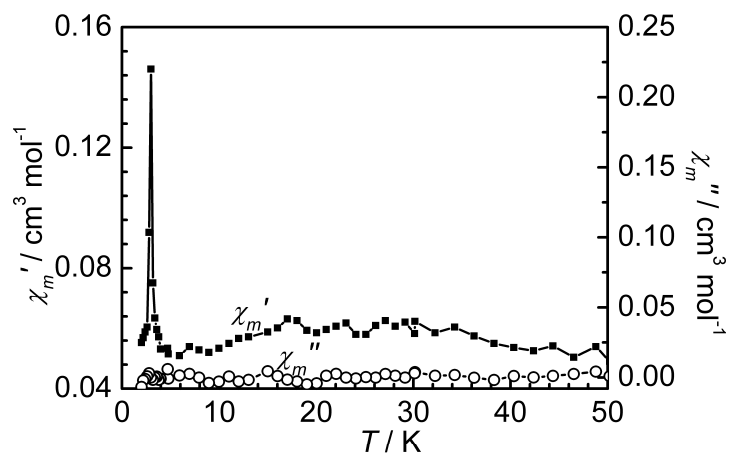

Figure S5 Temperature dependence of ac susceptibility of compound 1 at 3 Oe ac field and zero

dc bias field.

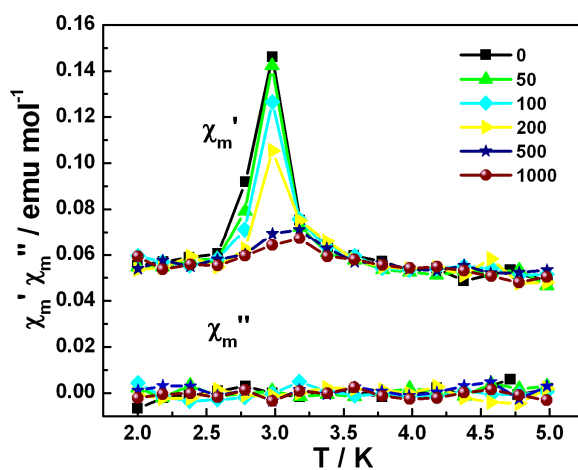

Figure S6 Temperature dependence of ac susceptibility of compound **1** at 3 Oe ac field and dc bias fields ranging from 0 to 1000 Oe.
